# Supplementary figures and images for: The ENTH domain protein Clint1 is required for epidermal homeostasis in zebrafish
Source: Oxford University Press journal article supplement (doi:10.1242/dev.038448), 2009-07-02

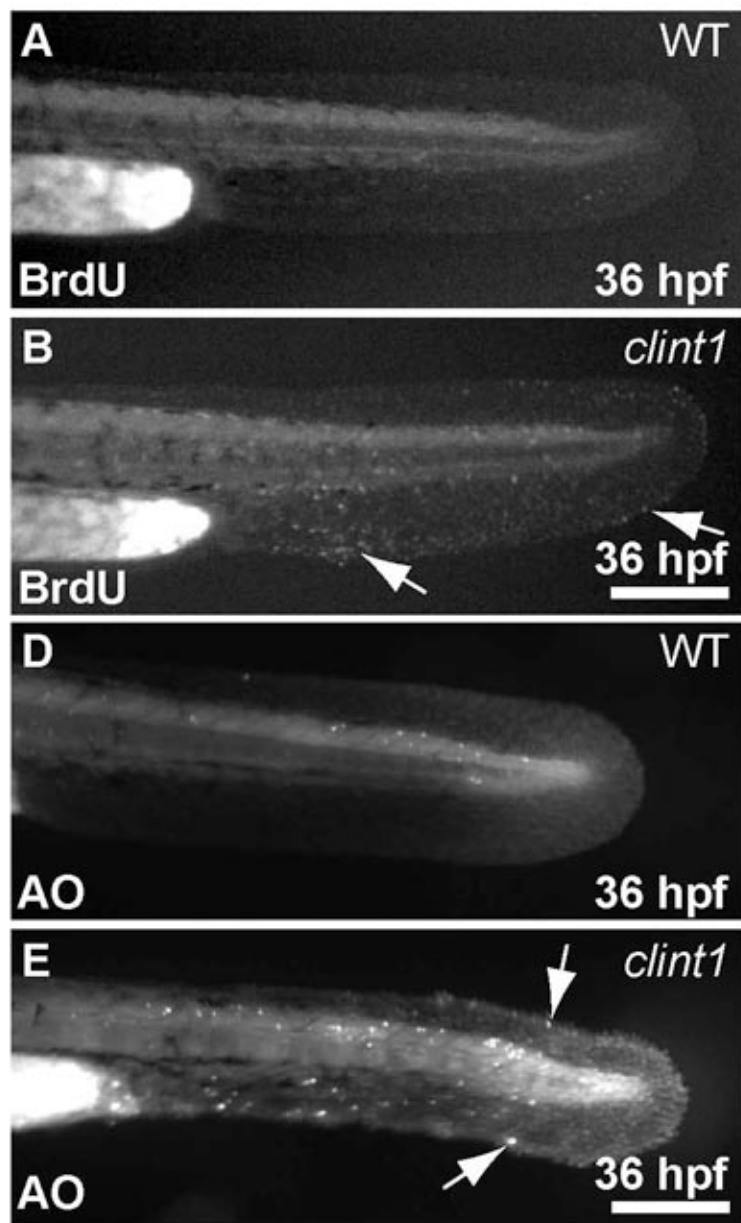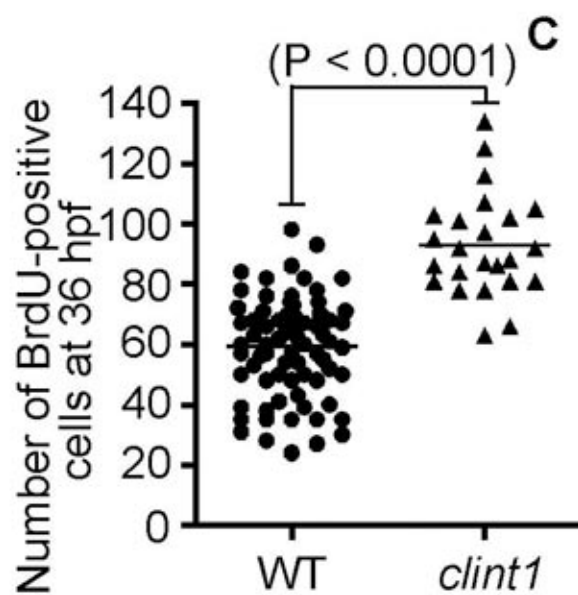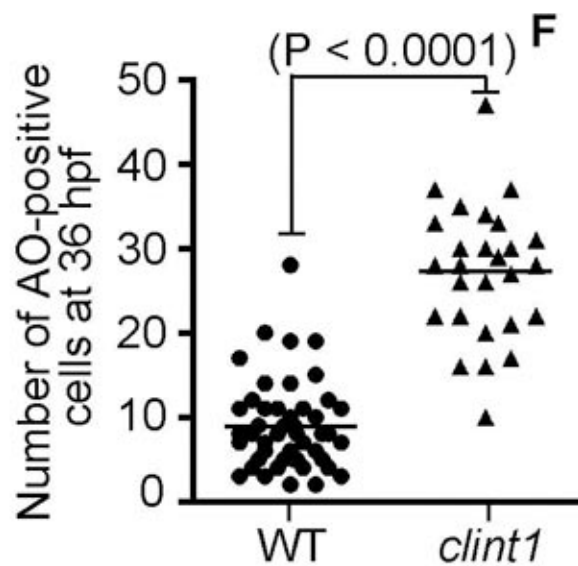

Supplement: dev038448-sup-038448-figs1.pdf [file dev038448-sup-038448-figs1.pdf]

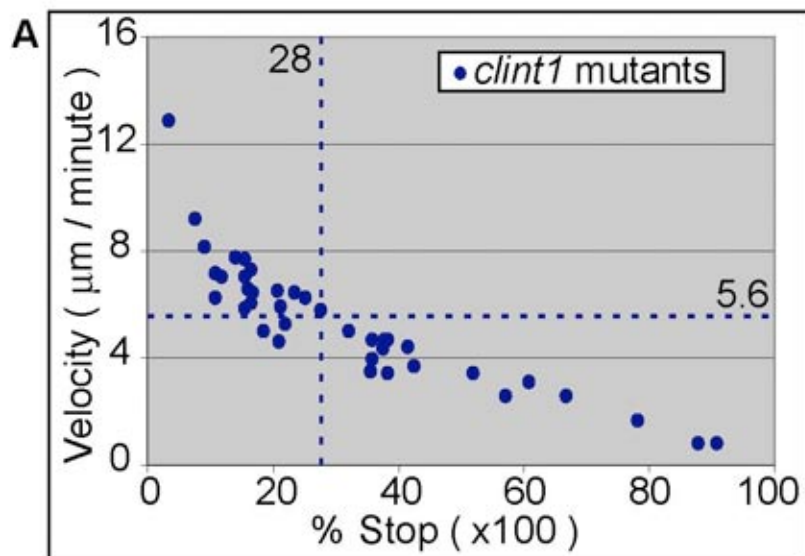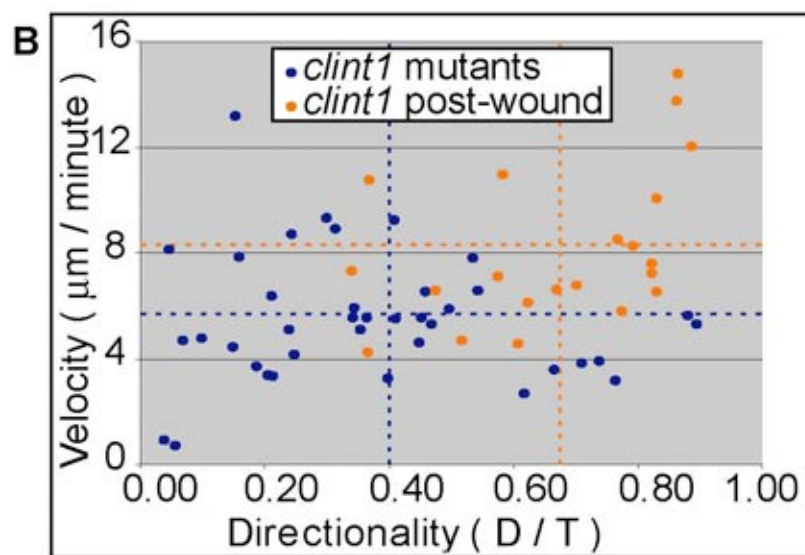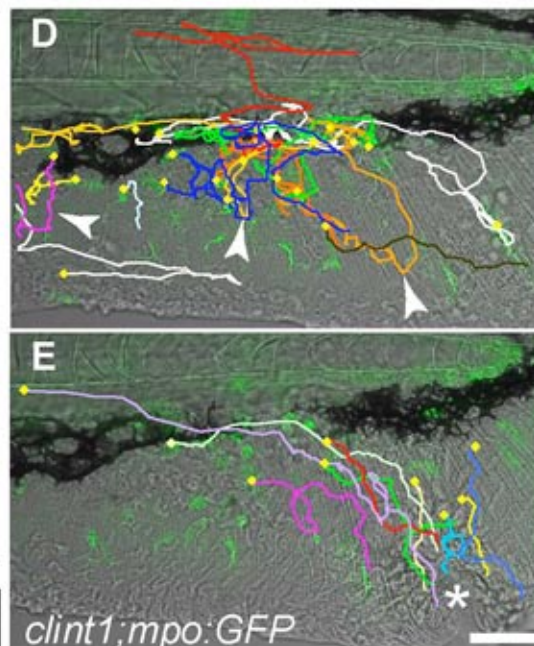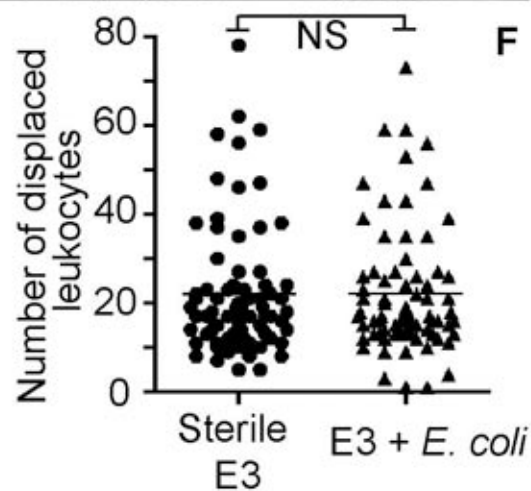

| <b>C</b>                 | Cells | Velocity ( $\mu\text{m}/\text{min}$ ) | Directionality (D/T) |
|--------------------------|-------|---------------------------------------|----------------------|
| <i>clint1</i> mutants    | 39    | 5.7 (+/- 0.43)                        | 0.4 (+/- 0.06)       |
| <i>clint1</i> post-wound | 22    | 8.3(+/- 2.5)                          | 0.67 (+/- 0.04)      |

Supplement: dev038448-sup-038448-figs2.pdf [file dev038448-sup-038448-figs2.pdf]

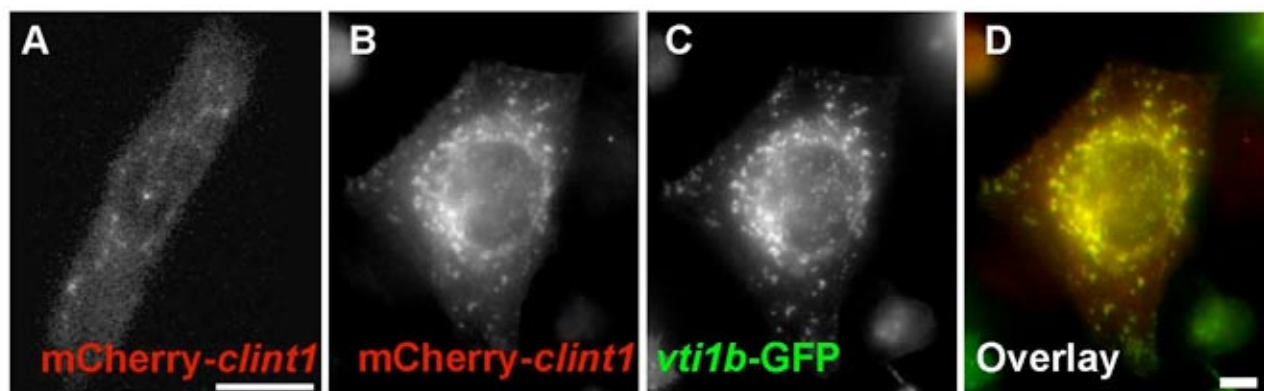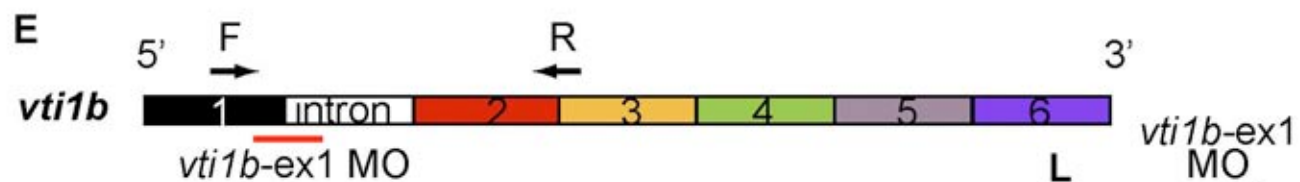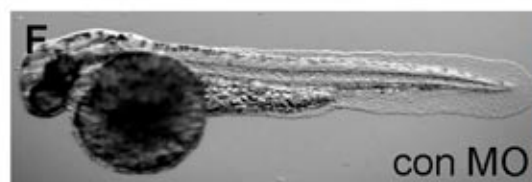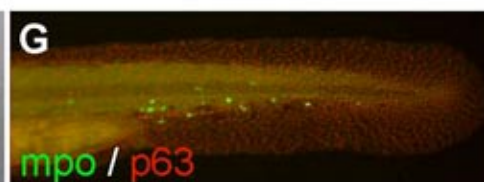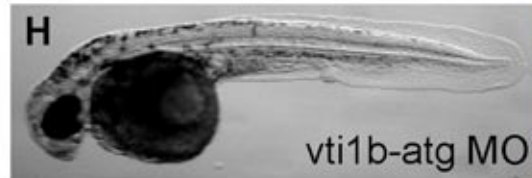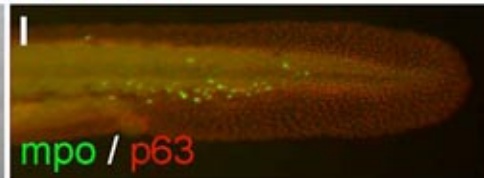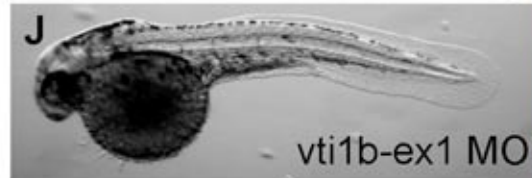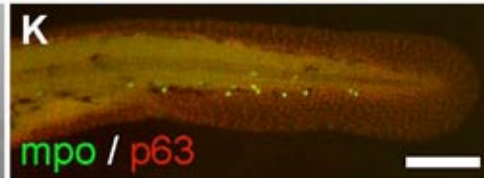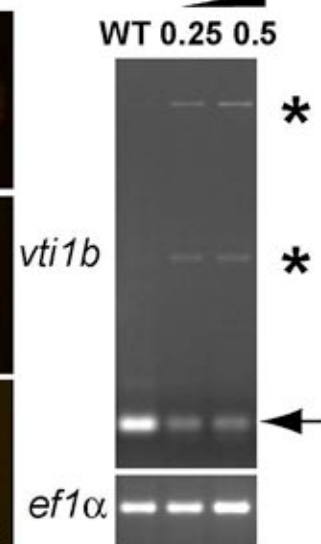

Supplement: dev038448-sup-038448-figs4.pdf [file dev038448-sup-038448-figs4.pdf]

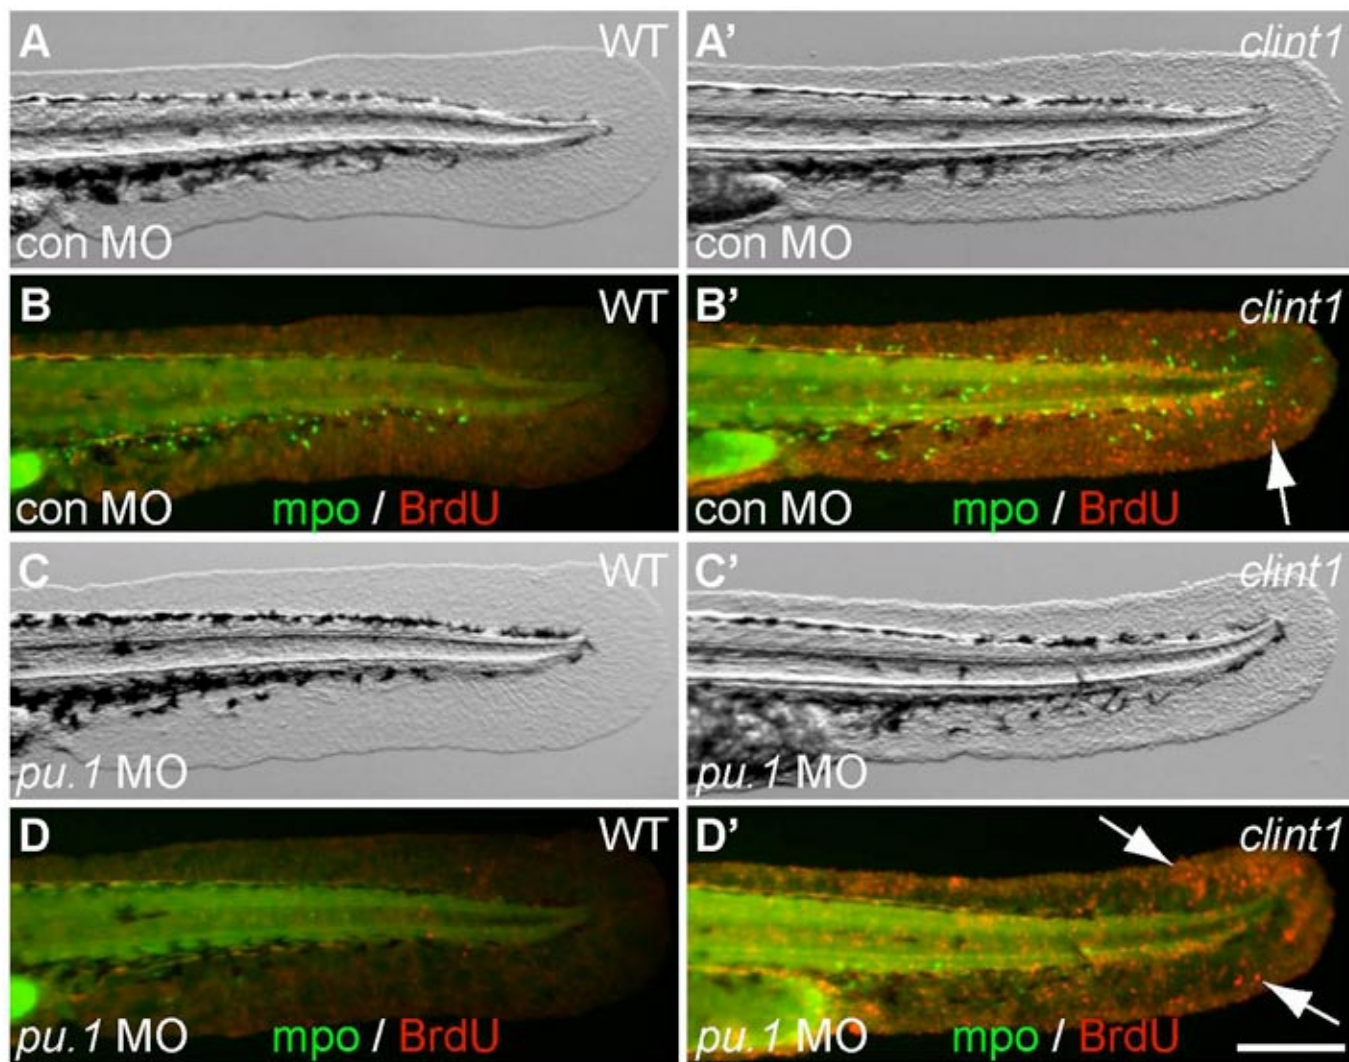

Supplement: dev038448-sup-038448-figs5.pdf [file dev038448-sup-038448-figs5.pdf]

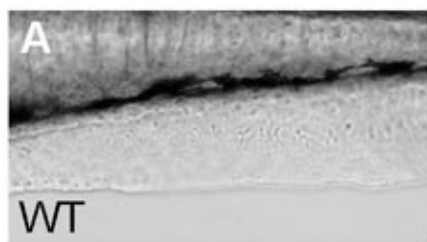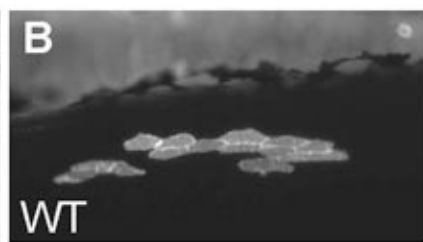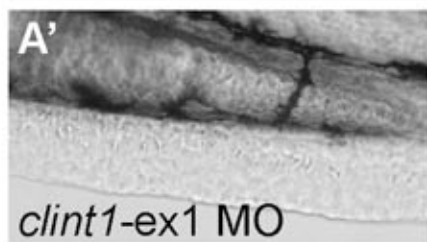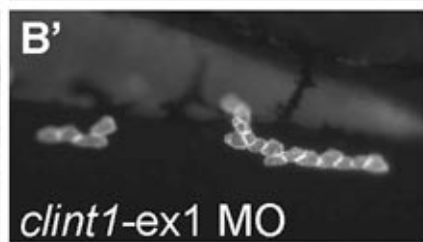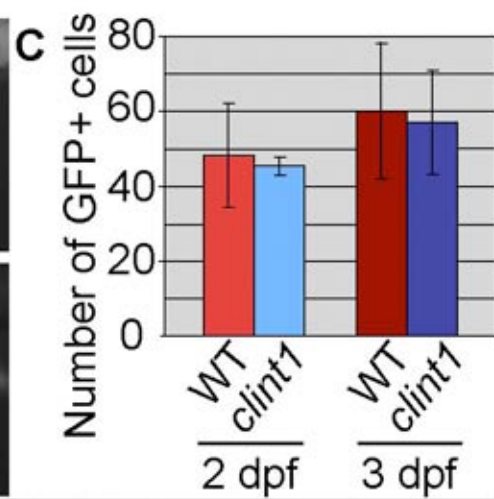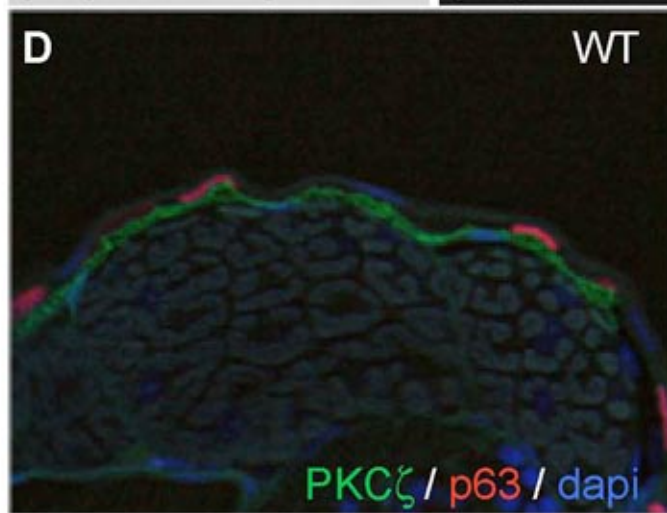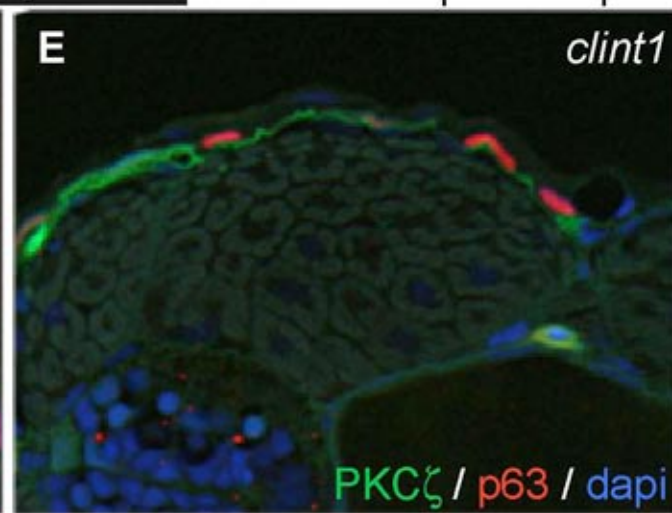

Supplement: dev038448-sup-038448-figs6.pdf [file dev038448-sup-038448-figs6.pdf]
